# Supplementary material for: Whole-Genome Sequence Analysis Reveals the Enterovirus D68 Isolates during the United States 2014 Outbreak Mainly Belong to a Novel Clade
Source: PubMed Central journal article supplement (PMC4606740; doi:10.1038/srep15223), 2015-10-15
Supplement: srep15223-s1.pdf [file srep15223-s1.pdf]

## **Whole-Genome Sequence Analysis Reveals the Enterovirus D68 Isolates during the United States 2014 Outbreak Mainly Belong to a Novel Clade**

Weihua Huang<sup>1\*</sup>, Guiqing Wang<sup>1,2</sup>, Jian Zhuge<sup>2</sup>, Sheila M. Nolan<sup>3</sup>, Nevenka Dimitrova<sup>4</sup>, John T. Fallon<sup>1,2</sup>

<sup>1</sup> Department of Pathology, New York Medical College, Valhalla, New York, United States of America

<sup>2</sup> Department of Pathology and Clinical Laboratories, Westchester Medical Center, Valhalla, New York, United States of America

<sup>3</sup> Division of Pediatric Infectious Disease, New York Medical College, Valhalla, New York, United States of America

<sup>4</sup> Philips Research North America, Briarcliff Manor, New York, United States of America

\* Corresponding author

Email: [weihua\\_huang@nymc.edu](mailto:weihua_huang@nymc.edu)

### **Supplemental Materials:**

**Suppl. Fig. 1** Multiple sequence alignment of 40 strains in the 5'UTR spacer region. In reference to the genome sequence of strain Fermon, two main deletions are identified, 23-24 nucleotides and 12-13 nucleotides, respectively. The five main clusters are shown in numbers. Red arrow and highlighted sequence: translation start codon; \*: consensus nucleotide.

**Suppl. Fig. 2** Multiple sequence alignment of 40 strains in a VP1 region. Only the five strains in Clade A or Lineage 3 have the three-nucleotide deletion, i.e. one amino acid deletion. The five main clusters are shown in numbers. \*: consensus nucleotide.

**Suppl. Table 1.** Summary of EV-D68 detection in a total of 93 samples using our metagenomics shotgun sequencing protocol, in comparison with that using the rRT-PCR assay previously. Cluster PF: clusters passing the filter; Cluster/Align: paired reads (read1/read2) aligned to the reference genome NY328; “-”: negative controls with EV-D68 undetectable under rRT-PCR.

| Sample            | Cluster PF | Cluster/Align | RT-PCR | Sample | Cluster PF | Cluster/Align | RT-PCR |
|-------------------|------------|---------------|--------|--------|------------|---------------|--------|
| NYA1 <sup>c</sup> | 51         | 0/0           | 19.88  | NY263  | 177739     | 899/859       | 21.00  |
| NY56 <sup>c</sup> | 36601      | 6/5           | 27.55  | NY265  | 155960     | 115/111       | 25.07  |
| NY58 <sup>c</sup> | 5231       | 7/6           | 29.47  | NY266  | 52211      | 8/3           | -      |
| NY67 <sup>c</sup> | 40256      | 2/1           | 31.85  | NY268  | 45284      | 2/2           | 27.62  |
| NY68 <sup>c</sup> | 7013       | 0/0           | 28.59  | NY269  | 60968      | 0/0           | -      |
| NY69 <sup>c</sup> | 26250      | 2/1           | 32.22  | NY273  | 102258     | 7/6           | 32.02  |
| NY70 <sup>c</sup> | 17345      | 2/3           | 28.04  | NY274  | 139884     | 27/26         | 29.13  |
| NY72 <sup>c</sup> | 20027      | 92/94         | 21.32  | NY275  | 60115      | 1379/1294     | 23.49  |
| NY73 <sup>c</sup> | 7800       | 415/388       | 18.71  | NY278  | 27890      | 2398/2298     | 23.04  |
| NY74              | 41716      | 729/628       | 20.96  | NY281  | 37310      | 0/0           | -      |
| NY77              | 44910      | 590/563       | 19.85  | NY284  | 2452       | 0/0           | -      |
| NY104             | 62748      | 3/3           | 30.94  | NY287  | 36643      | 2/1           | 33.86  |
| NY105             | 13077      | 0/0           | 33.41  | NY288  | 121863     | 1/1           | 33.68  |
| NY107             | 49126      | 150/134       | 24.52  | NY289  | 50456      | 289/280       | 23.11  |
| NY109             | 3454       | 0/0           | 35.10  | NY291  | 70759      | 26/25         | 29.90  |
| NY110             | 44289      | 1/0           | 31.96  | NY293  | 96547      | 30/28         | 26.65  |
| NY120             | 113245     | 1760/1755     | 20.09  | NY295  | 50532      | 43/40         | 24.21  |
| NY121             | 6758       | 0/0           | -      | NY300  | 136866     | 57/48         | 27.36  |
| NY122             | 11429      | 0/0           | -      | NY301  | 258728     | 7/4           | 30.94  |
| NY123             | 65604      | 0/0           | 32.21* | NY302  | 263861     | 319/309       | 24.97  |
| NY124             | 191261     | 662/611       | 23.30  | NY303  | 223897     | 4837/4537     | 19.88  |
| NY126             | 196033     | 523/491       | 22.99  | NY305  | 138637     | 867/810       | 24.65  |
| NY129             | 214899     | 0/1           | 33.63  | NY306  | 95802      | 5/3           | 32.08  |
| NY130             | 105283     | 746/759       | 22.17  | NY309  | 166518     | 1931/1855     | 22.68  |
| NY132             | 158789     | 14/13         | 28.46  | NY314  | 178162     | 647/609       | 23.12  |
| NY134             | 148534     | 8000/7468     | 24.03  | NY315  | 80372      | 0/1           | -      |
| NY135             | 217149     | 0/0           | 35.30  | NY316  | 164816     | 1530/1473     | 21.96  |
| NY136             | 155035     | 6572/6266     | 18.11  | NY318  | 54265      | 37/35         | 27.21  |
| NY139             | 139267     | 66/63         | 24.66  | NY319  | 41091      | 325/318       | 26.25  |
| NY153             | 131194     | 1520/1473     | 20.19  | NY321  | 228798     | 7071/6707     | 17.94  |
| NY156             | 11410      | 1/1           | 34.33  | NY324  | 46442      | 2/0           | 35.09  |
| NY160             | 71142      | 387/366       | 21.25  | NY326  | 47022      | 2903/2793     | 21.80  |
| NY165             | 230482     | 18/12         | 26.06  | NY328  | 175316     | 850/812       | 23.73  |

|       |        |             |       |                    |        |           |       |
|-------|--------|-------------|-------|--------------------|--------|-----------|-------|
| NY171 | 474420 | 6/4         | 30.89 | NY329              | 240676 | 3537/3342 | 20.24 |
| NY177 | 295373 | 1/0         | -     | NY331              | 114788 | 25/26     | 29.10 |
| NY178 | 82310  | 769/735     | 24.16 | NY333              | 54681  | 4/4       | 31.27 |
| NY179 | 128909 | 0/0         | -     | NY339              | 35206  | 1/0       | -     |
| NY181 | 354497 | 1/1         | 30.69 | NY342              | 94906  | 0/0       | -     |
| NY193 | 178338 | 51470/48986 | 15.12 | NY364 <sup>n</sup> | 22519  | 2/1       | -     |
| NY197 | 44174  | 78/76       | 26.86 | NY365 <sup>n</sup> | 45136  | 0/0       | -     |
| NY207 | 109842 | 2/1         | -     | NY366 <sup>n</sup> | 30495  | 1/1       | -     |
| NY209 | 11194  | 179/169     | 27.36 | NY367 <sup>n</sup> | 55262  | 0/0       | -     |
| NY210 | 23244  | 4105/3924   | 21.41 | NY368 <sup>n</sup> | 49998  | 0/0       | -     |
| NY236 | 28102  | 0/1         | 33.72 | NY369 <sup>n</sup> | 43191  | 0/0       | -     |
| NY241 | 156380 | 48/45       | 30.31 | NY370 <sup>n</sup> | 261433 | 1/0       | -     |
| NY247 | 217170 | 1/0         | 39.76 | NY371 <sup>n</sup> | 108221 | 1/0       | -     |
| NY262 | 191094 | 1/1         | 29.26 |                    |        |           |       |

c: carrier RNA used in RNA elution; n: 2013 sample; \*: false positive confirmed by Sanger sequencing

**Suppl. Table 2.** Clinical characteristics of 20 EV-D68 strains with complete or near-complete genome sequenced and their estimated genome coverage.

| Sample ID | Patient |     |                  | Estimated Genome Coverage |
|-----------|---------|-----|------------------|---------------------------|
|           | Age     | Sex | City             |                           |
| NY120     | 2       | M   | Yonkers          | 93                        |
| NY124     | 0.8     | M   | Mohegan Lake     | 31                        |
| NY126     | 10      | M   | Goshen           | 22                        |
| NY130     | 2       | F   | Yonkers          | 43                        |
| NY153     | 4       | F   | Yonkers          | 73                        |
| NY160     | 11      | F   | Garrison         | 17                        |
| NY210     | 5       | M   | Poughkeepsie     | 185                       |
| NY263     | 11      | F   | Mount Vernon     | 44                        |
| NY275     | 6       | M   | Middletown       | 51                        |
| NY278     | 12      | M   | Tappan           | 86                        |
| NY305     | 5       | M   | West Harrison    | 38                        |
| NY309     | 0.9     | M   | Briarcliff Manor | 91                        |
| NY314     | 1       | M   | Jefferson Valley | 27                        |
| NY316     | 3       | F   | Briarcliff Manor | 71                        |
| NY326     | 9       | M   | Pelham           | 123                       |
| NY328     | 0.5     | M   | Newburgh         | 39                        |
| NY329     | 8       | M   | West Harrison    | 160                       |
| NY73      | 3       | F   | Ossining         | 10                        |
| NY74      | 4       | F   | Ossining         | 21                        |
| NY77      | 5       | F   | New Paltz        | 29                        |

**Suppl. Table 3.** Statistics for correlation of main genomic features in 40 strains with the EV-D68 outbreak in 2014 USA, using both Pearson's chi-square test and Fisher's exact test.

|                | Cluster 1 | Cluster 2 | Cluster 3 | Cluster 4 | Cluster 5 | Total | $\chi^2$ | <i>p</i> -value | Fisher <i>p</i> -value |
|----------------|-----------|-----------|-----------|-----------|-----------|-------|----------|-----------------|------------------------|
| <b>Group N</b> | 1         | 4         | 3         | 0         | 3         | 11    | 22.50    | 1.6E-04         | 3.0E-05                |
| <b>Group O</b> | 0         | 1         | 0         | 2         | 26        | 29    |          |                 |                        |

**Suppl. Table 4.** Statistics for associations of the three identified variables with the EV-D68 outbreak in 2014 USA, using both Pearson's chi-square test and Fisher's exact test.

| Position (NY328) | Variant | Amino Acid | Group N | Group O | Total Strains | $\chi^2$ | <i>p</i> -value | Fisher <i>p</i> -value |
|------------------|---------|------------|---------|---------|---------------|----------|-----------------|------------------------|
| 1817             | C       | Asn        | 11      | 2       | 40            | 27.41    | 1.6E-07         | 3.4E-08                |
|                  | T       | Asn        | 0       | 27      |               |          |                 |                        |
| 3277             | C       | Thr        | 10      | 2       | 40            | 22.95    | 1.7E-06         | 8.0E-07                |
|                  | A       | Asn        | 1       | 27      |               |          |                 |                        |
| 4020             | A       | Ser        | 9       | 2       | 40            | 16.15    | 5.9E-05         | 9.8E-06                |
|                  | G       | Gly        | 2       | 27      |               |          |                 |                        |

**Suppl. Table 5.** Statistics for association of the combined two functional variables C3277A and A4020G with the EV-D68 outbreak in 2014 USA, using both Pearson's chi-square test and Fisher's exact test.

|                | C3277-A4020 | A3277-A4020 | C3277-G4020 | A3277-G4020 | Total Strain | $\chi^2$ | <i>p</i> -value | Fisher <i>p</i> -value |
|----------------|-------------|-------------|-------------|-------------|--------------|----------|-----------------|------------------------|
| <b>Group N</b> | 9           | 0           | 1           | 1           | 11           | 26.96    | 6.0E-06         | 1.4E-06                |
| <b>Group O</b> | 2           | 1           | 0           | 26          | 29           |          |                 |                        |
